# Supplementary material
Source: publisher figshare collection journal article supplement (https://sage.figshare.com/ndownloader/files/16450277)
Supplement: Supplementary file 1 [file 16450277]

### Supplementary material file 3: Data extraction forms

**Title: Internet-based interventions for adults with hearing loss, tinnitus, and vestibular disorders**

**Trial registration no: PROSPERO CRD42018094801**

#### Data collection forms

##### 1. General information

| Category                       | Description                                        |
|--------------------------------|----------------------------------------------------|
| Study reference                | List authors, title, and journal, publication date |
| Study identification number    |                                                    |
| Date review completed          |                                                    |
| Completed by                   |                                                    |
| Reviewed by                    |                                                    |
| Study author contact details   |                                                    |
| Study author contacted         | Dates and nature of contact                        |
| Sources of funding             |                                                    |
| Possible conflicts of interest | For study authors                                  |

##### 2. Eligibility

| Category                      | Description                                                            | Location in Text |
|-------------------------------|------------------------------------------------------------------------|------------------|
| Target condition              | Hearing loss, tinnitus or vestibular disorders                         |                  |
| Stage of treatment pathway    | Pre-intervention, new hearing aid users, experiences hearing aid users |                  |
| Study design and type         | Efficacy or effectiveness study                                        |                  |
| Treatment arms                | Number and type of treatment arms                                      |                  |
| Setting and population sample | Clinic, self-referred                                                  |                  |
| Key conclusions               | Main study findings                                                    |                  |
| Eligibility                   | Confirm eligibility or reasons for exclusion                           |                  |

##### 3. Participants

| Entry                             | Description and character of the information                                                             | Location in Text |
|-----------------------------------|----------------------------------------------------------------------------------------------------------|------------------|
| Sample size calculations provided | Calculations for sample size determination                                                               |                  |
| Number of participants            | Number randomised and present in each group                                                              |                  |
| Mean age                          | Mean age in years and months, standard deviations and ranges for participants and ratio in each subgroup |                  |
| Gender                            | Present the genders represented and ratio in each subgroup                                               |                  |
| Duration of disorder              | Present in years, months together with standard deviations and ranges                                    |                  |
| Country and location              | Country and the city where the study was conducted                                                       |                  |

|                          |                                                                                       |  |
|--------------------------|---------------------------------------------------------------------------------------|--|
| Study inclusion criteria | Study inclusion criteria                                                              |  |
| Study exclusion criteria | Study exclusion criteria                                                              |  |
| Exclusions               | Participants excluded                                                                 |  |
| Methods of recruitment   | How was recruitment approached                                                        |  |
| Baseline imbalances      | Any baseline differences that need to be accounted for                                |  |
| Withdrawals              | Number of participants from each group withdrawing or not completing outcome measures |  |

#### 4. Interventions

| Entry                      | Description and character of the information                               |
|----------------------------|----------------------------------------------------------------------------|
| Intervention type          | Type of intervention                                                       |
| Theoretical basis          | theoretical basis for the intervention content                             |
| Treatment duration         | Treatment dose and frequency                                               |
| Provision of guidance      | Profession, number of professionals                                        |
| Intervention delivery mode | Whether a blended approach was included and the dose and frequency thereof |
| Comparator                 | Type of comparator                                                         |
| Comparator duration        | Dose and frequency of comparator                                           |
| Co-interventions           | Hearing aid fittings and other interventions                               |

#### 5. Outcomes

| Entry                   | Description and character of the information                                                                | Located in the text |
|-------------------------|-------------------------------------------------------------------------------------------------------------|---------------------|
| Primary outcome         | What is the primary outcome being assessed                                                                  |                     |
| Primary outcome measure | Name of the measure/s selected                                                                              |                     |
| Time points measure     | Time points of measuring primary outcome intervals such as 3, 6, 12 months post-intervention                |                     |
| Secondary outcome       | What are the secondary outcome/s being assessed                                                             |                     |
| Secondary outcome       | Name of the secondary outcome measure/s selected for depression, anxiety, insomnia and quality of life used |                     |
| Handling missing data   | ITT analysis used and type                                                                                  |                     |
| Adverse effects         | Record reporting of adverse events                                                                          |                     |

#### 6. Results: Experimental intervention and comparator

| Entry                     | Experimental intervention (for each active Internet-intervention) |    |             |                        | Comparator |    |             |                        |
|---------------------------|-------------------------------------------------------------------|----|-------------|------------------------|------------|----|-------------|------------------------|
|                           | Mean                                                              | SD | Effect size | Number of participants | Mean       | SD | Effect size | Number of participants |
| Primary outcome: Baseline |                                                                   |    |             |                        |            |    |             |                        |

|                                          |  |  |  |  |  |  |  |  |
|------------------------------------------|--|--|--|--|--|--|--|--|
| Primary outcome:<br>Post-intervention    |  |  |  |  |  |  |  |  |
| Primary outcome:<br>latest-follow-up     |  |  |  |  |  |  |  |  |
| Depression outcome:<br>baseline          |  |  |  |  |  |  |  |  |
| Depression outcome:<br>post-intervention |  |  |  |  |  |  |  |  |
| Anxiety outcome:<br>baseline             |  |  |  |  |  |  |  |  |
| Anxiety outcome:<br>post-intervention    |  |  |  |  |  |  |  |  |
| Insomnia outcome:<br>baseline            |  |  |  |  |  |  |  |  |
| Insomnia outcome:<br>post-intervention   |  |  |  |  |  |  |  |  |
| QOL outcome:<br>baseline                 |  |  |  |  |  |  |  |  |
| QOL outcome:<br>post-intervention        |  |  |  |  |  |  |  |  |

### 7. Risk of bias assessment

| Domain                     | Risk of bias             |                          |                          |                          |                          | Support for judgement<br><i>(include direct quotes where available with explanatory comments)</i> | Location in text |
|----------------------------|--------------------------|--------------------------|--------------------------|--------------------------|--------------------------|---------------------------------------------------------------------------------------------------|------------------|
|                            | Yes                      | Probably yes             | Probably no              | No                       | NoInfo                   |                                                                                                   |                  |
| Random sequence generation | <input type="checkbox"/> |                                                                                                   |                  |
| Allocation concealment     | <input type="checkbox"/> |                                                                                                   |                  |

|                                        |                                                  |                                                |                                               |                                              |                          |                                                |  |
|----------------------------------------|--------------------------------------------------|------------------------------------------------|-----------------------------------------------|----------------------------------------------|--------------------------|------------------------------------------------|--|
| Deviations from intended interventions | <input type="checkbox"/>                         | <input type="checkbox"/>                       | <input type="checkbox"/>                      | <input type="checkbox"/>                     | <input type="checkbox"/> |                                                |  |
| Incomplete outcome data                | <input type="checkbox"/>                         | <input type="checkbox"/>                       | <input type="checkbox"/>                      | <input type="checkbox"/>                     | <input type="checkbox"/> |                                                |  |
| Bias in the measurement of outcome     | <input type="checkbox"/>                         | <input type="checkbox"/>                       | <input type="checkbox"/>                      | <input type="checkbox"/>                     | <input type="checkbox"/> |                                                |  |
| Selective outcome reporting?           | <input type="checkbox"/>                         | <input type="checkbox"/>                       | <input type="checkbox"/>                      | <input type="checkbox"/>                     | <input type="checkbox"/> |                                                |  |
| Overall risk of bias judgment          | Low risk<br><input type="checkbox"/>             | Some concerns<br><input type="checkbox"/>      | High risk of bias<br><input type="checkbox"/> |                                              |                          |                                                |  |
| Predicted direction of bias            | Favours experimental<br><input type="checkbox"/> | Favours comparator<br><input type="checkbox"/> | Unpredictable<br><input type="checkbox"/>     | Towards the null<br><input type="checkbox"/> |                          | Away from the null<br><input type="checkbox"/> |  |
